# Supplementary material for: LTCC-based broadband double-channel NMR coil with a split-spiral geometry
Source: Research Square preprint supplement (doi:10.21203/rs.3.rs-5804664/v1), 2025-01-16
Supplement: Supplementary file 1 [file 10fb5435e77bfe5ee985de58.pdf]

## §1 Supplementary Information

### §1.1 3D printed chip supporter

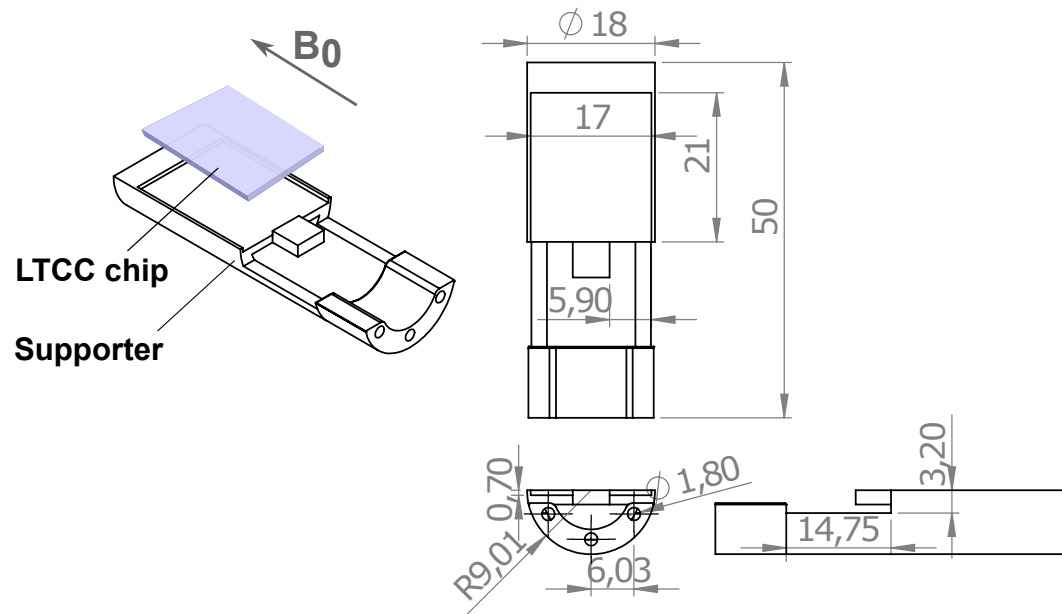

Figure S1: Assembly of the chip model with SLA 3D printed supporter. The dimensional parameters are shown in 3 views in the unit of mm.
